# Supplementary material for: Significant improvement in the hydrogen storage capacity of a reduced graphene oxide/TiO2 nanocomposite by chemical bonding of Ti–O–C
Source: Royal Society of Chemistry journal article supplement (doi:10.1039/c6ra00944a), 2016-01-01
Supplement: c6ra00944a1.pdf [file c6ra00944a1.pdf]

## Significant improvement of the hydrogen storage capacity of reduced graphene oxide/TiO<sub>2</sub> nanocomposite by chemical bonding of Ti–O–C

Zahra Gohari Bajestani<sup>a</sup>, Alp Yürüm<sup>b</sup>, and Yuda Yürüm<sup>a\*</sup>

<sup>a</sup> Faculty of Engineering and Natural Sciences, Sabanci University, Tuzla/Istanbul, 34956

<sup>b</sup> Sabanci University Nanotechnology Research and Application Center, Tuzla/Istanbul, 34956

Exact concentration of TiO<sub>2</sub> particles in RGO-TiO<sub>2</sub> nanocomposites was measured by thermogravimetric analysis (TGA). TGA was carried out by heating up the nanocomposites at 10 K/min from room temperature to 1300 °C under air atmosphere followed by 3 hours of soaking step at this temperature. Concentration of TiO<sub>2</sub> in each sample was calculated from the difference between residual mass of specimens and RGO without deposition (reference sample) at the end of the measurement. TGA graph of all nanocomposites and reference was shown in Fig. S1.

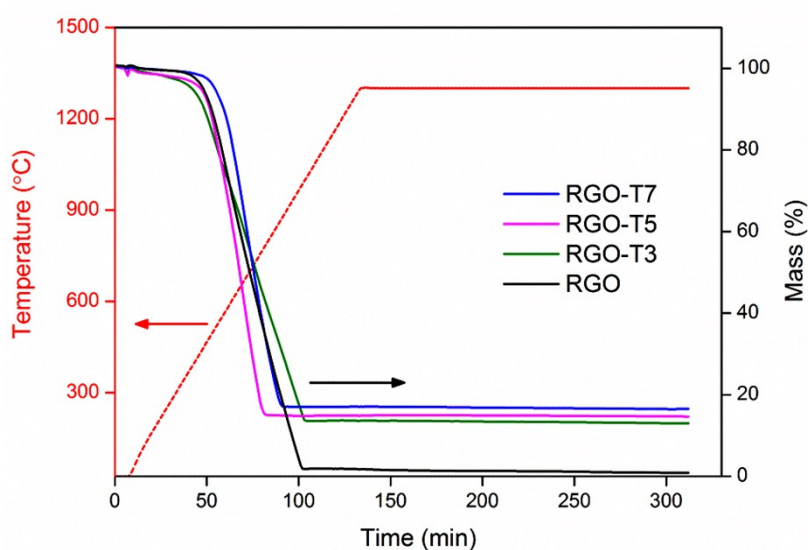

Fig. S1 TGA of RGO-T nanocomposites as a function of time and temperature
